# Supplementary material for: Comparative analysis of semaglutide induced adverse reactions: Insights from FAERS database and social media reviews with a focus on oral vs subcutaneous administration
Source: Front Pharmacol. 2024 Oct 22;15:1471615. doi: 10.3389/fphar.2024.1471615 (PMC11534668; doi:10.3389/fphar.2024.1471615)
Supplement: Supplementary file 1 [file Table2.xlsx]

## Sheet: Sheet1
Table S2.Four grid table of disproportion analysis
Drug	NO. of target events	NO. of other events	Total
Target drug	a	b	a+b
Other drugs	c	d	c+d
Total	a+c	b+d	a+b+c+d
