# Supplementary material for: Comparative analysis of semaglutide induced adverse reactions: Insights from FAERS database and social media reviews with a focus on oral vs subcutaneous administration
Source: Front Pharmacol. 2024 Oct 22;15:1471615. doi: 10.3389/fphar.2024.1471615 (PMC11534668; doi:10.3389/fphar.2024.1471615)
Supplement: Supplementary file 2 [file Table1.xlsx]

## Sheet: Sheet1
Table S1. Examples of patients reviews of smeglutide in health forum
Rating	Reason	Sex	Age	Duration	Comments
2	Weight loss	F	29	4 weeks	My first 3 weeks were fine. Then the vomiting, diarrhea and sulphurburps came. Where there were sulphurburps there was vomiting and diarrhea. I have had to miss work for multiple days due to the vomiting and diarrhea. I'm down 12 pounds, and I'm hoping to stick with it longer.
2	Diabetes and obesity	F	50	3 months	I have sulphur burps and diarrhea. I have not noticed significant weight loss, but my A1C has gone from 6.9 down to 6.0.
1	Diabetes	M	70	16 weeks	Extreme side effects! Indigestion, constipation, stomach upset, heart burn! Nausea! Developed stomach paralsis !
4.3	Weight loss	F	55	1-6months	First lower dose didn’t do anything for me and no symptoms. First week on highest dosage 50, was tough, vomiting, constipation, fever for 24hours.
4.7	Weight loss	F	65	Less than 1 month	I use it for weightloss. The first 2 weeks of injections I got waves of nausea for about 24hrs. And was very tired. By my 3rd week all that resolved and no side effects. After 3weeks I've lost 11 pounds. It really does reduce your appetite.
